# Supplementary material for: Contribution of type 2 diabetes to all-cause mortality, cardiovascular disease incidence and cancer incidence in white Europeans and South Asians: findings from the UK Biobank population-based cohort study
Source: PubMed Central journal article supplement — BMJ Open Diabetes Res Care. 2019 Dec 17;7(1):e000765. doi: 10.1136/bmjdrc-2019-000765 (PMC6936483; doi:10.1136/bmjdrc-2019-000765), 2019-12-17

## Supplementary Material

Supplementary Table 1: Cox-proportional hazard for all-cause mortality, CVD and cancer incidence and mortality by ethnicity.

|                            | Total n | Deaths/<br>Events | White-<br>Europeans<br>HR (95%-CI) | South<br>Asians<br>HR (95%-CI) | p-value           |
|----------------------------|---------|-------------------|------------------------------------|--------------------------------|-------------------|
| <b>All-cause mortality</b> |         |                   |                                    |                                |                   |
| Model 0                    | 465,037 | 12,974            | 1.00 (Ref)                         | 1.04 (0.84; 1.24)              | 0.661             |
| Model 1                    | 465,037 | 12,974            | 1.00 (Ref)                         | 1.14 (0.95; 1.37)              | 0.142             |
| Model 2                    | 465,037 | 12,974            | 1.00 (Ref)                         | 0.94 (0.78; 1.12)              | 0.492             |
| Model 3                    | 395,203 | 7,932             | 1.00 (Ref)                         | 0.84 (0.62; 1.12)              | 0.233             |
| <b>CVD mortality</b>       |         |                   |                                    |                                |                   |
| Model 0                    | 448,240 | 3,251             | 1.00 (Ref)                         | 1.73 (1.31; 2.29)              | <b>&lt;0.0001</b> |
| Model 1                    | 448,240 | 3,251             | 1.00 (Ref)                         | 1.69 (1.27; 2.24)              | <b>&lt;0.0001</b> |
| Model 2                    | 448,240 | 3,251             | 1.00 (Ref)                         | 1.42 (1.07; 1.89)              | <b>0.014</b>      |
| Model 3                    | 395,203 | 2,381             | 1.00 (Ref)                         | 1.28 (0.84; 1.97)              | 0.242             |
| <b>CVD incidence</b>       |         |                   |                                    |                                |                   |
| Model 0                    | 448,239 | 30,347            | 1.00 (Ref)                         | 1.93 (1.78; 2.11)              | <b>&lt;0.0001</b> |
| Model 1                    | 448,239 | 30,347            | 1.00 (Ref)                         | 1.89 (1.73; 2.06)              | <b>&lt;0.0001</b> |
| Model 2                    | 448,239 | 30,347            | 1.00 (Ref)                         | 1.78 (1.63; 1.94)              | <b>&lt;0.0001</b> |
| Model 3                    | 395,202 | 24,648            | 1.00 (Ref)                         | 1.80 (1.62; 2.01)              | <b>&lt;0.0001</b> |
| <b>Cancer mortality</b>    |         |                   |                                    |                                |                   |
| Model 0                    | 427,411 | 5,642             | 1.00 (Ref)                         | 0.56 (0.39; 0.80)              | <b>0.002</b>      |
| Model 1                    | 427,411 | 5,642             | 1.00 (Ref)                         | 0.62 (0.43; 0.90)              | <b>0.012</b>      |
| Model 2                    | 427,411 | 5,642             | 1.00 (Ref)                         | 0.59 (0.41; 0.85)              | <b>0.005</b>      |
| Model 3                    | 395,203 | 4,786             | 1.00 (Ref)                         | 0.64 (0.41; 1.00)              | 0.052             |
| <b>Cancer incidence</b>    |         |                   |                                    |                                |                   |
| Model 0                    | 427,410 | 27,159            | 1.00 (Ref)                         | 0.77 (0.67; 0.89)              | <b>&lt;0.0001</b> |
| Model 1                    | 427,410 | 27,159            | 1.00 (Ref)                         | 0.81 (0.70; 0.93)              | <b>0.003</b>      |
| Model 2                    | 427,410 | 27,159            | 1.00 (Ref)                         | 0.80 (0.70; 0.92)              | <b>0.002</b>      |
| Model 3                    | 395,202 | 24,287            | 1.00 (Ref)                         | 0.84 (0.71; 0.99)              | <b>0.036</b>      |

European participants were used as the reference categories. Participants were included if they were free of CVD at baseline for CVD outcomes and free of cancer at baseline for cancer outcomes. Model 0 was adjusted for age, sex, deprivation index, income and professional qualifications. Model 1 was additionally adjusted for smoking, red meat intake, processed meat intake, oily fish intake, fruit and vegetable intake, the frequency of alcohol intake, sedentary time, total physical activity, sleep duration, BMI, and comorbidities including CVD and cancer if these were not the main outcome. Model 2 was additionally adjusted for diabetes status. Model 3 was a sensitivity analysis of model 1, with participants with T2D were excluded from the analyses.

HR, hazard ratio; 95% CI, 95% confidence interval; n, number of participants; CVD, cardiovascular disease.

Supplementary Table 2: Cox-proportional hazard for all-cause mortality, CVD and cancer incidence and mortality by diabetes and ethnicity.

|                            | Total n | Deaths/<br>Events | White-Europeans            |                         |         | South-Asians      |                            |                         | p-value           | p <sub>(interaction)</sub> |       |
|----------------------------|---------|-------------------|----------------------------|-------------------------|---------|-------------------|----------------------------|-------------------------|-------------------|----------------------------|-------|
|                            |         |                   | Without T2D<br>HR (95% CI) | With T2D<br>HR (95% CI) | Total n | Deaths/<br>Events | Without T2D<br>HR (95% CI) | With T2D<br>HR (95% CI) |                   |                            |       |
| <b>All-cause mortality</b> |         |                   |                            |                         |         |                   |                            |                         |                   |                            |       |
| Model 0                    | 457,935 | 12,852            | 1.00 (Ref)                 | 1.77 (1.68; 1.87)       | <0.001  | 7,102             | 122                        | 1.00 (Ref)              | 2.36 (1.62; 3.45) | <0.001                     | 0.299 |
| Model 1                    | 457,935 | 12,852            | 1.00 (Ref)                 | 1.62 (1.53; 1.72)       | <0.001  | 7,102             | 122                        | 1.00 (Ref)              | 2.46 (1.67; 3.63) | <0.001                     | 0.190 |
| <b>CVD mortality</b>       |         |                   |                            |                         |         |                   |                            |                         |                   |                            |       |
| Model 0                    | 441,505 | 3,200             | 1.00 (Ref)                 | 2.36 (2.13; 2.61)       | <0.001  | 6,735             | 51                         | 1.00 (Ref)              | 3.88 (2.16; 6.97) | <0.001                     | 0.366 |
| Model 1                    | 441,505 | 3,200             | 1.00 (Ref)                 | 1.99 (1.79; 2.21)       | <0.001  | 6,735             | 51                         | 1.00 (Ref)              | 4.26 (2.32; 7.80) | <0.001                     | 0.208 |
| <b>CVD incidence</b>       |         |                   |                            |                         |         |                   |                            |                         |                   |                            |       |
| Model 0                    | 441,504 | 29,806            | 1.00 (Ref)                 | 1.58 (1.52; 1.64)       | <0.001  | 6,735             | 541                        | 1.00 (Ref)              | 1.63 (1.35; 1.97) | 0.012                      | 0.663 |
| Model 1                    | 441,504 | 29,806            | 1.00 (Ref)                 | 1.36 (1.31; 1.43)       | <0.001  | 6,735             | 541                        | 1.00 (Ref)              | 1.62 (1.33; 1.97) | 0.019                      | 0.634 |
| <b>Cancer mortality</b>    |         |                   |                            |                         |         |                   |                            |                         |                   |                            |       |
| Model 0                    | 420,558 | 5,613             | 1.00 (Ref)                 | 1.38 (1.25; 1.51)       | <0.001  | 6,853             | 29                         | 1.00 (Ref)              | 1.36 (0.59; 3.09) | 0.470                      | 0.627 |
| Model 1                    | 420,558 | 5,613             | 1.00 (Ref)                 | 1.30 (1.18; 1.43)       | <0.001  | 6,853             | 29                         | 1.00 (Ref)              | 1.56 (0.67; 3.65) | 0.307                      | 0.713 |
| <b>Cancer incidence</b>    |         |                   |                            |                         |         |                   |                            |                         |                   |                            |       |
| Model 0                    | 420,557 | 26,963            | 1.00 (Ref)                 | 1.07 (1.02; 1.13)       | 0.010   | 6,853             | 196                        | 1.00 (Ref)              | 1.04 (0.74; 1.47) | 0.820                      | 0.645 |
| Model 1                    | 420,557 | 26,963            | 1.00 (Ref)                 | 1.05 (0.99; 1.10)       | 0.097   | 6,853             | 196                        | 1.00 (Ref)              | 1.05 (0.74; 1.50) | 0.776                      | 0.735 |

Participants without T2D were used as the reference categories. Participants were included if they were free of CVD at baseline for CVD outcomes and free of cancer at baseline for cancer outcomes. Model 0 was adjusted for age, sex, deprivation index, income and professional qualifications. Model 1 was additionally adjusted for smoking, red meat intake, processed meat intake, oily fish intake, fruit and vegetable intake, the frequency of alcohol intake, sedentary time, total physical activity, sleep duration and BMI.

HR, hazard ratio; 95% CI, 95% confidence interval; n, number of participants; CVD, cardiovascular disease.

**Supplementary Table 3: Cox-proportional hazard for all-cause mortality, CVD and cancer incidence and mortality by ethnicity after adjusting for different markers of adiposity.**

|                            | Total n | Deaths/<br>Events | White-<br>Europeans<br>HR (95%-CI) | South<br>Asians<br>HR (95%-CI) | p-value           |
|----------------------------|---------|-------------------|------------------------------------|--------------------------------|-------------------|
| <b>All-cause mortality</b> |         |                   |                                    |                                |                   |
| Adjusted for BMI           | 465,037 | 12,974            | 1.00 (Ref)                         | 1.04 (0.84; 1.24)              | 0.661             |
| Adjusted for WC            | 465,037 | 12,974            | 1.00 (Ref)                         | 1.06 (1.09; 1.10)              | <b>&lt;0.0001</b> |
| Adjusted for Body Fat      | 465,037 | 12,974            | 1.00 (Ref)                         | 1.06 (0.88; 1.27)              | 0.553             |
| Adjusted for all three     | 395,203 | 7,932             | 1.00 (Ref)                         | 1.08 (0.90; 1.30)              | 0.419             |
| <b>CVD mortality</b>       |         |                   |                                    |                                |                   |
| Adjusted for BMI           | 448,240 | 3,251             | 1.00 (Ref)                         | 1.73 (1.31; 2.29)              | <b>&lt;0.0001</b> |
| Adjusted for WC            | 448,240 | 3,251             | 1.00 (Ref)                         | 1.71 (1.29; 2.27)              | <b>&lt;0.0001</b> |
| Adjusted for Body Fat      | 448,240 | 3,251             | 1.00 (Ref)                         | 1.70 (1.27; 2.27)              | <b>&lt;0.0001</b> |
| Adjusted for all three     | 395,203 | 2,381             | 1.00 (Ref)                         | 1.81 (1.36; 2.42)              | <b>&lt;0.0001</b> |
| <b>CVD incidence</b>       |         |                   |                                    |                                |                   |
| Adjusted for BMI           | 448,239 | 30,347            | 1.00 (Ref)                         | 1.93 (1.78; 2.11)              | <b>&lt;0.0001</b> |
| Adjusted for WC            | 448,239 | 30,347            | 1.00 (Ref)                         | 1.87 (1.72; 2.04)              | <b>&lt;0.0001</b> |
| Adjusted for Body Fat      | 448,239 | 30,347            | 1.00 (Ref)                         | 1.84 (1.68; 2.01)              | <b>&lt;0.0001</b> |
| Adjusted for all three     | 395,202 | 24,648            | 1.00 (Ref)                         | 1.94 (1.77; 2.12)              | <b>&lt;0.0001</b> |
| <b>Cancer mortality</b>    |         |                   |                                    |                                |                   |
| Adjusted for BMI           | 427,411 | 5,642             | 1.00 (Ref)                         | 0.56 (0.39; 0.80)              | <b>0.002</b>      |
| Adjusted for WC            | 427,411 | 5,642             | 1.00 (Ref)                         | 0.63 (0.43; 0.90)              | <b>0.013</b>      |
| Adjusted for Body Fat      | 427,411 | 5,642             | 1.00 (Ref)                         | 0.65 (0.45; 0.94)              | <b>0.022</b>      |
| Adjusted for all three     | 395,203 | 4,786             | 1.00 (Ref)                         | 0.66 (0.46; 0.95)              | <b>0.026</b>      |
| <b>Cancer incidence</b>    |         |                   |                                    |                                |                   |
| Adjusted for BMI           | 427,410 | 27,159            | 1.00 (Ref)                         | 0.77 (0.67; 0.89)              | <b>&lt;0.0001</b> |
| Adjusted for WC            | 427,410 | 27,159            | 1.00 (Ref)                         | 0.81 (0.70; 0.93)              | <b>0.003</b>      |
| Adjusted for Body Fat      | 427,410 | 27,159            | 1.00 (Ref)                         | 0.81 (0.70; 0.93)              | <b>0.003</b>      |
| Adjusted for all three     | 395,202 | 24,287            | 1.00 (Ref)                         | 0.81 (0.70; 0.94)              | <b>0.005</b>      |

European participants were used as the reference categories. Participants were included if they were free of CVD at baseline for CVD outcomes and free of cancer at baseline for cancer outcomes. Analyses were adjusted for age, sex, deprivation index, income, professional qualifications, smoking, red meat intake, processed meat intake, oily fish intake, fruit and vegetable intake, the frequency of alcohol intake, sedentary time, total physical activity, sleep duration and different adiposity variables, by including BMI alone, WC alone, body fat alone and the three adiposity markers together.

HR, hazard ratio; 95% CI, 95% confidence interval; n, number of participants; CVD, cardiovascular disease.

**Supplementary Table 4: Cox-proportional hazard for all-cause mortality, CVD and cancer incidence and mortality by diabetes and ethnicity after adjusting for different markers of adiposity.**

|                            | Total n | Deaths/<br>Events | White-Europeans                     |                                  |         | South Asians |                   |                            |                         |         |
|----------------------------|---------|-------------------|-------------------------------------|----------------------------------|---------|--------------|-------------------|----------------------------|-------------------------|---------|
|                            |         |                   | White<br>Without T2D<br>HR (95% CI) | White<br>With T2D<br>HR (95% CI) | p-value | Total n      | Deaths/<br>Events | Without T2D<br>HR (95% CI) | With T2D<br>HR (95% CI) | p-value |
| <b>All-cause mortality</b> |         |                   |                                     |                                  |         |              |                   |                            |                         |         |
| Adjusted for BMI           | 457,935 | 12,852            | 1.00 (Ref)                          | 1.77 (1.68; 1.87)                | <0.001  | 7,102        | 122               | 1.00 (Ref)                 | 2.36 (1.62; 3.45)       | <0.001  |
| Adjusted for WC            | 457,843 | 12,843            | 1.00 (Ref)                          | 1.53 (1.45; 1.62)                | <0.0001 | 7,099        | 122               | 1.00 (Ref)                 | 2.41 (1.63; 3.57)       | <0.0001 |
| Adjusted for Body Fat      | 451,196 | 12,435            | 1.00 (Ref)                          | 1.58 (1.49; 1.68)                | <0.0001 | 7,016        | 116               | 1.00 (Ref)                 | 2.57 (1.73; 3.83)       | <0.0001 |
| Adjusted for all three     | 451,131 | 12,428            | 1.00 (Ref)                          | 1.49 (1.40; 1.58)                | <0.0001 | 7,015        | 116               | 1.00 (Ref)                 | 2.51 (1.68; 3.74)       | <0.0001 |
| <b>CVD mortality</b>       |         |                   |                                     |                                  |         |              |                   |                            |                         |         |
| Adjusted for BMI           | 441,505 | 3,200             | 1.00 (Ref)                          | 2.36 (2.13; 2.61)                | <0.001  | 6,735        | 51                | 1.00 (Ref)                 | 3.88 (2.16; 6.97)       | <0.001  |
| Adjusted for WC            | 441,418 | 3,199             | 1.00 (Ref)                          | 1.78 (1.60; 1.98)                | <0.0001 | 6,732        | 51                | 1.00 (Ref)                 | 4.11 (2.24; 7.54)       | <0.0001 |
| Adjusted for Body Fat      | 435,521 | 3,079             | 1.00 (Ref)                          | 1.94 (1.74; 2.16)                | <0.0001 | 6,654        | 49                | 1.00 (Ref)                 | 4.84 (2.61; 8.96)       | <0.0001 |
| Adjusted for all three     | 435,460 | 3,078             | 1.00 (Ref)                          | 1.73 (1.55; 1.93)                | <0.0001 | 6,653        | 49                | 1.00 (Ref)                 | 4.74 (2.55; 8.80)       | <0.0001 |
| <b>CVD incidence</b>       |         |                   |                                     |                                  |         |              |                   |                            |                         |         |
| Adjusted for BMI           | 441,504 | 29,806            | 1.00 (Ref)                          | 1.58 (1.52; 1.64)                | <0.001  | 6,735        | 541               | 1.00 (Ref)                 | 1.63 (1.35; 1.97)       | 0.012   |
| Adjusted for WC            | 441,417 | 29,794            | 1.00 (Ref)                          | 1.29 (1.24; 1.35)                | <0.0001 | 6,732        | 541               | 1.00 (Ref)                 | 1.57 (1.29; 1.91)       | <0.0001 |
| Adjusted for Body Fat      | 435,520 | 29,069            | 1.00 (Ref)                          | 1.39 (1.33; 1.45)                | <0.0001 | 6,654        | 529               | 1.00 (Ref)                 | 1.67 (1.37; 2.03)       | <0.0001 |
| Adjusted for all three     | 435,459 | 29,059            | 1.00 (Ref)                          | 1.29 (1.24; 1.35)                | <0.0001 | 6,653        | 529               | 1.00 (Ref)                 | 1.61 (1.32; 1.95)       | <0.0001 |
| <b>Cancer mortality</b>    |         |                   |                                     |                                  |         |              |                   |                            |                         |         |
| Adjusted for BMI           | 420,558 | 5,613             | 1.00 (Ref)                          | 1.38 (1.25; 1.51)                | <0.001  | 6,853        | 29                | 1.00 (Ref)                 | 1.36 (0.59; 3.09)       | 0.470   |
| Adjusted for WC            | 420,488 | 5,611             | 1.00 (Ref)                          | 1.24 (1.13; 1.37)                | <0.0001 | 6,850        | 29                | 1.00 (Ref)                 | 1.67 (0.70; 3.94)       | 0.245   |
| Adjusted for Body Fat      | 414,477 | 5,494             | 1.00 (Ref)                          | 1.31 (1.19; 1.45)                | <0.0001 | 6,768        | 29                | 1.00 (Ref)                 | 1.56 (0.67; 3.63)       | 0.303   |
| Adjusted for all three     | 414,433 | 5,493             | 1.00 (Ref)                          | 1.26 (1.14; 1.39)                | <0.0001 | 6,767        | 29                | 1.00 (Ref)                 | 1.70 (0.72; 4.00)       | 0.227   |
| <b>Cancer incidence</b>    |         |                   |                                     |                                  |         |              |                   |                            |                         |         |
| Adjusted for BMI           | 420,557 | 26,963            | 1.00 (Ref)                          | 1.07 (1.02; 1.13)                | 0.010   | 6,853        | 196               | 1.00 (Ref)                 | 1.04 (0.74; 1.47)       | 0.820   |
| Adjusted for WC            | 420,487 | 26,958            | 1.00 (Ref)                          | 1.03 (0.98; 1.09)                | 0.236   | 6,850        | 196               | 1.00 (Ref)                 | 1.04 (0.73; 1.48)       | 0.841   |
| Adjusted for Body Fat      | 414,476 | 26,522            | 1.00 (Ref)                          | 1.06 (1.00; 1.12)                | 0.033   | 6,768        | 190               | 1.00 (Ref)                 | 1.06 (0.74; 1.52)       | 0.733   |
| Adjusted for all three     | 414,432 | 26,518            | 1.00 (Ref)                          | 1.04 (0.98; 1.10)                | 0.165   | 6,767        | 190               | 1.00 (Ref)                 | 1.03 (0.72; 1.48)       | 0.857   |

Participants without T2D were used as the reference categories for each of the ethnic groups. Participants were included if they were free of CVD at baseline for CVD outcomes and free of cancer at baseline for cancer outcomes. Analyses were adjusted for age, sex, deprivation index, income, professional qualifications, smoking, red meat intake, processed meat intake, oily fish intake, fruit and vegetable intake, the frequency of alcohol intake, sedentary time, total physical activity, sleep duration and different adiposity variables, by including BMI alone, WC alone, body fat alone and the three adiposity markers together. HR, hazard ratio; 95% CI, 95% confidence interval; n, number of participants; CVD, cardiovascular disease.

**Supplementary Figure 1: Directed acyclic graph (DAG) of the causal pathway between type 2 diabetes and all-cause mortality**

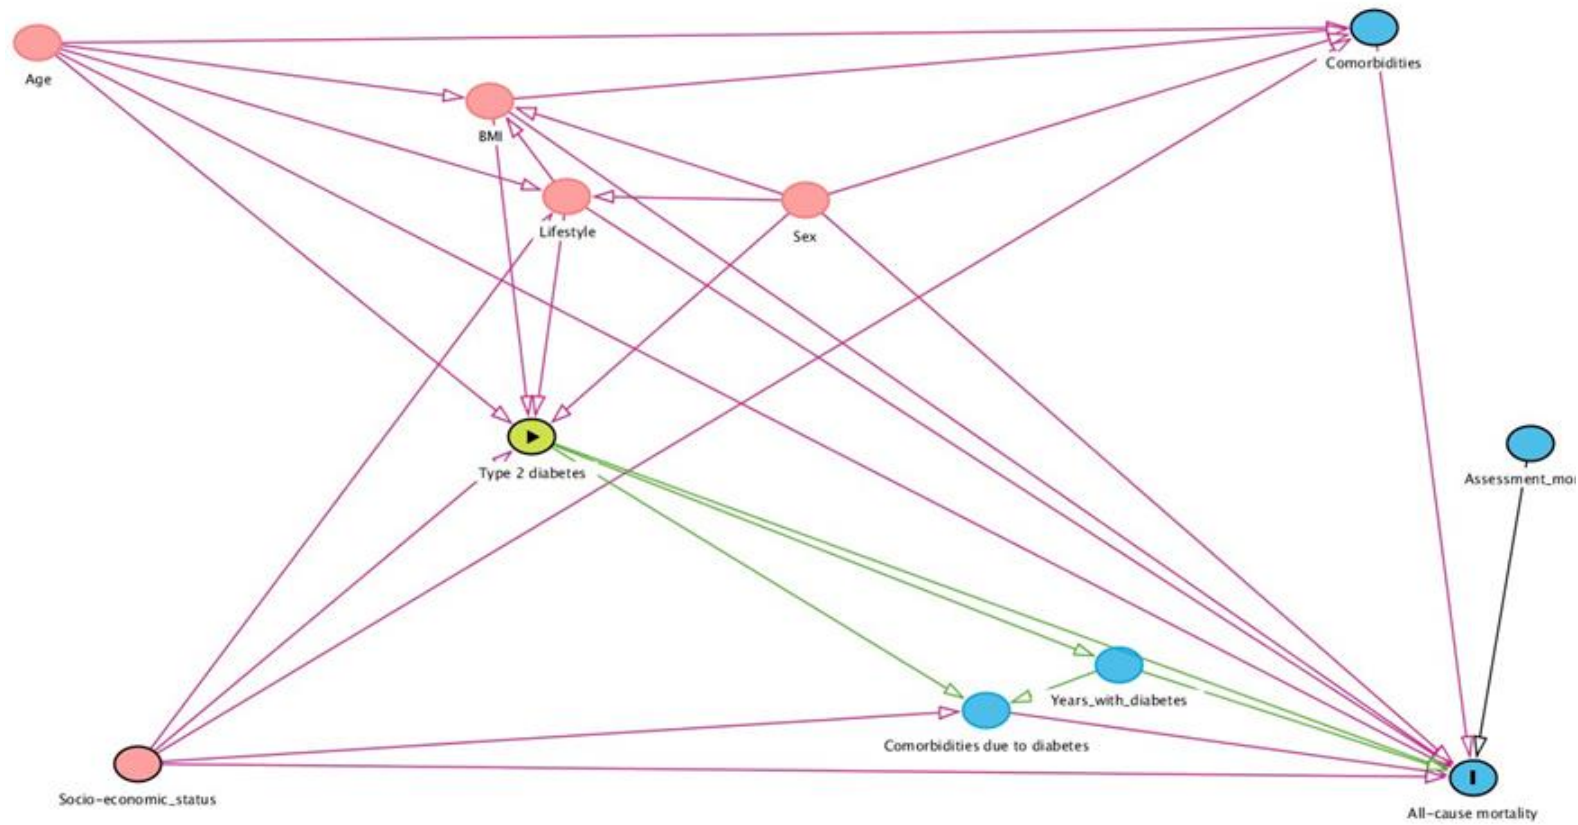

Supplement: bmjdrc-2019-000765supp001.pdf [file bmjdrc-2019-000765supp001.pdf]
